# Supplementary material for: Oxovanadium(iv) complexes of phenanthroline bases: the dipyridophenazine complex as a near-IR photocytotoxic agent
Source: Royal Society of Chemistry journal article supplement (doi:10.1039/b917265c), 2010-01-01
Supplement: b917265c.pdf [file b917265c.pdf]

# **Oxovanadium(IV) complexes of phenanthroline bases: the dipyridophenazine complex as a near-IR photocytotoxic agent**

Pijus K. Sasmal,<sup>a</sup> Sounik Saha,<sup>a</sup> Ritankar Majumdar,<sup>b</sup> Swati De,<sup>a</sup> Rajan R. Dighe,<sup>b</sup> and Akhil R. Chakravarty<sup>\*a</sup>

<sup>a</sup> *Department of Inorganic and Physical Chemistry, Indian Institute of Science, Bangalore 560012, India. Fax: (+91)80-23600683; Tel: +91-80-22932533; E-mail: arc@ipc.iisc.ernet.in*

<sup>b</sup> *Department of Molecular Reproduction, Development and Genetics, Indian Institute of Science, Bangalore 560012, India.*

Electronic Supplementary Information

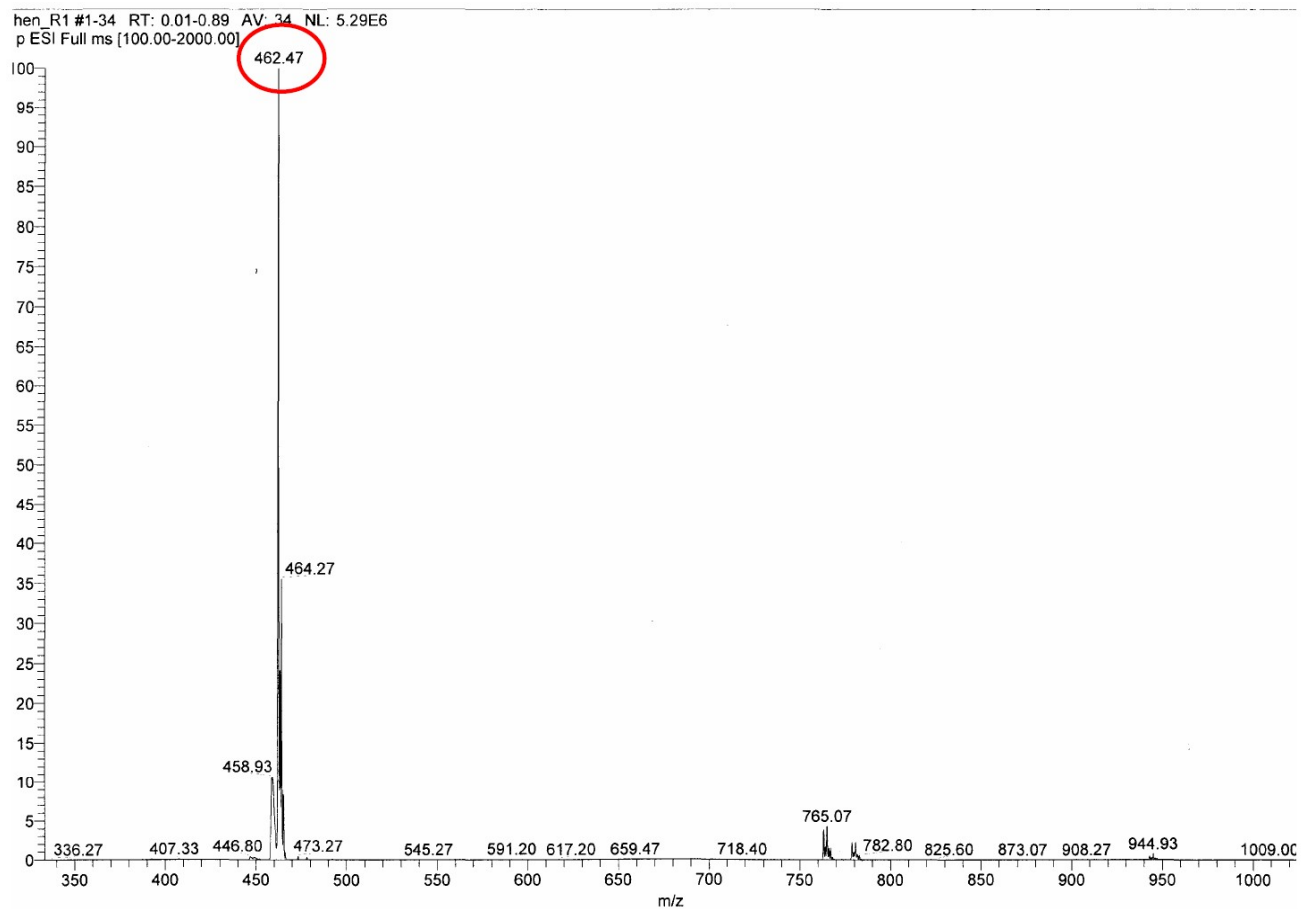

**Fig. S1.** The ESI-MS spectrum of complex **1** showing the parent ion peak at 462.47 (m/z) in MeOH.

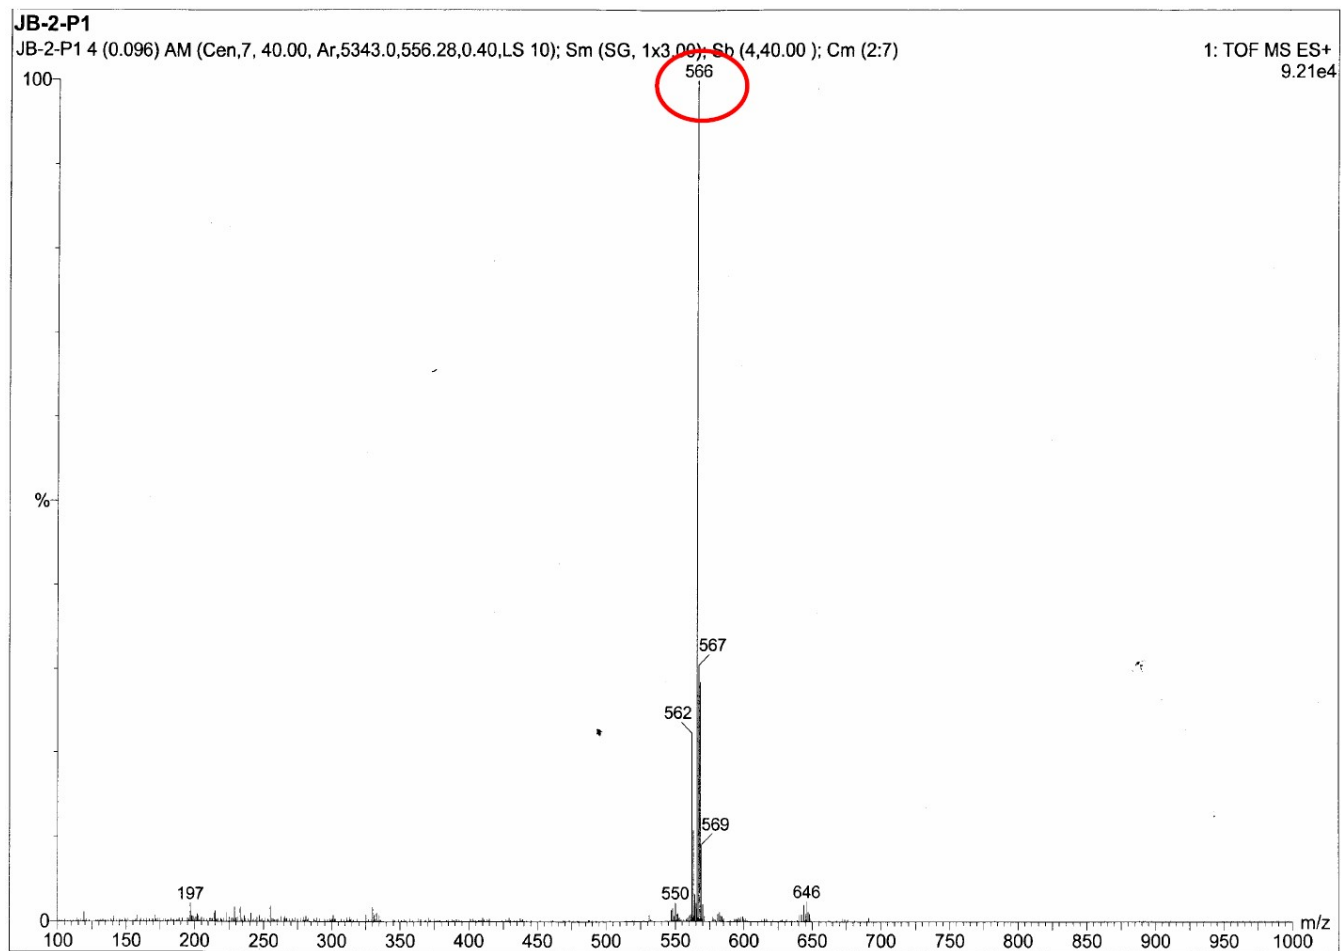

**Fig. S2.** The ESI-MS spectrum of complex **2** showing the parent ion peak at 566 (m/z) in MeOH.

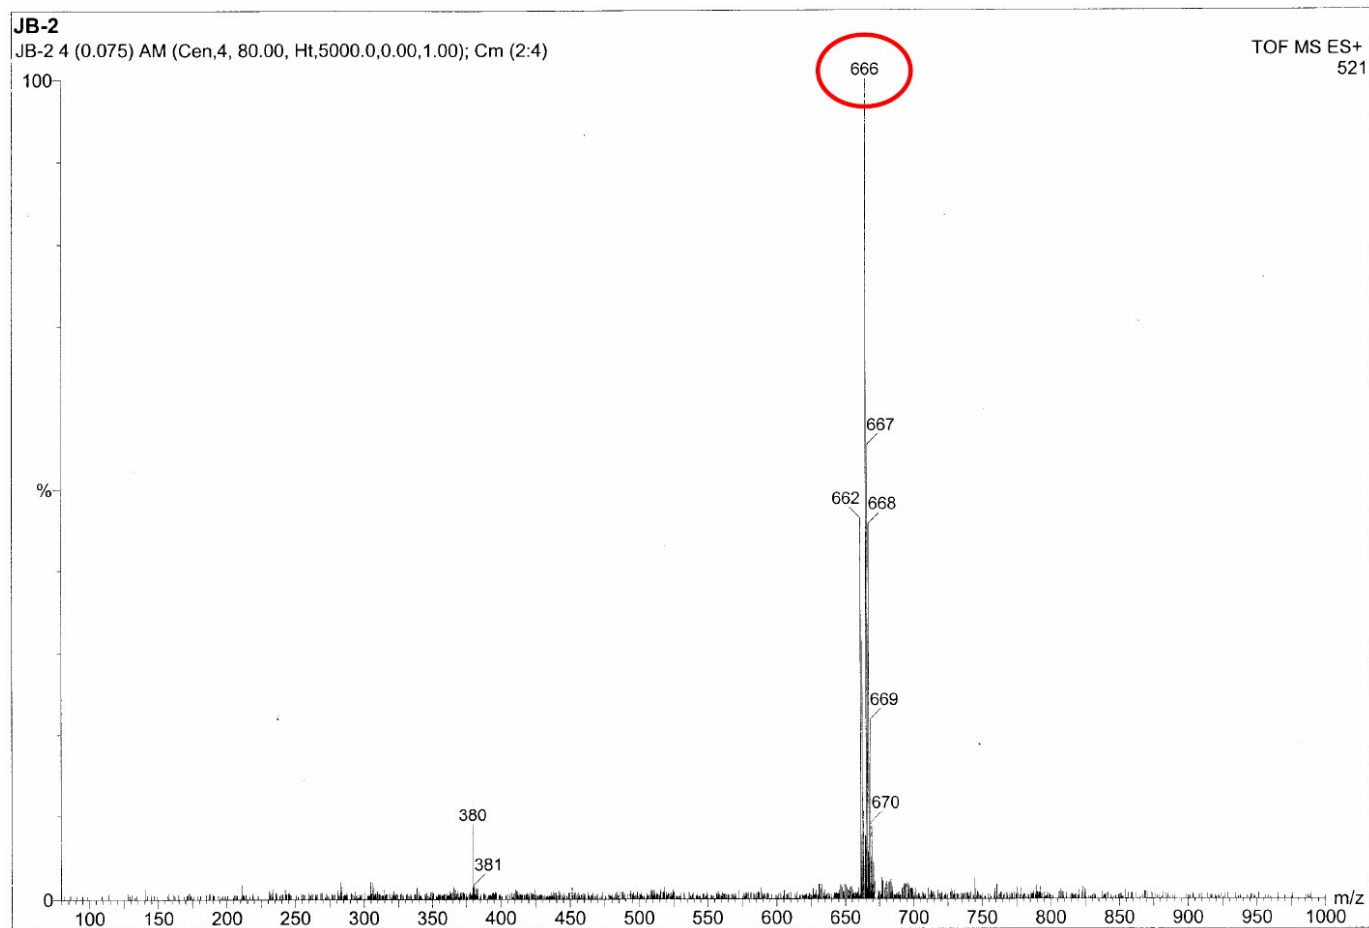

**Fig. S3.** The ESI-MS spectrum of complex **3** showing the parent ion peak at 666 (m/z) in MeOH.

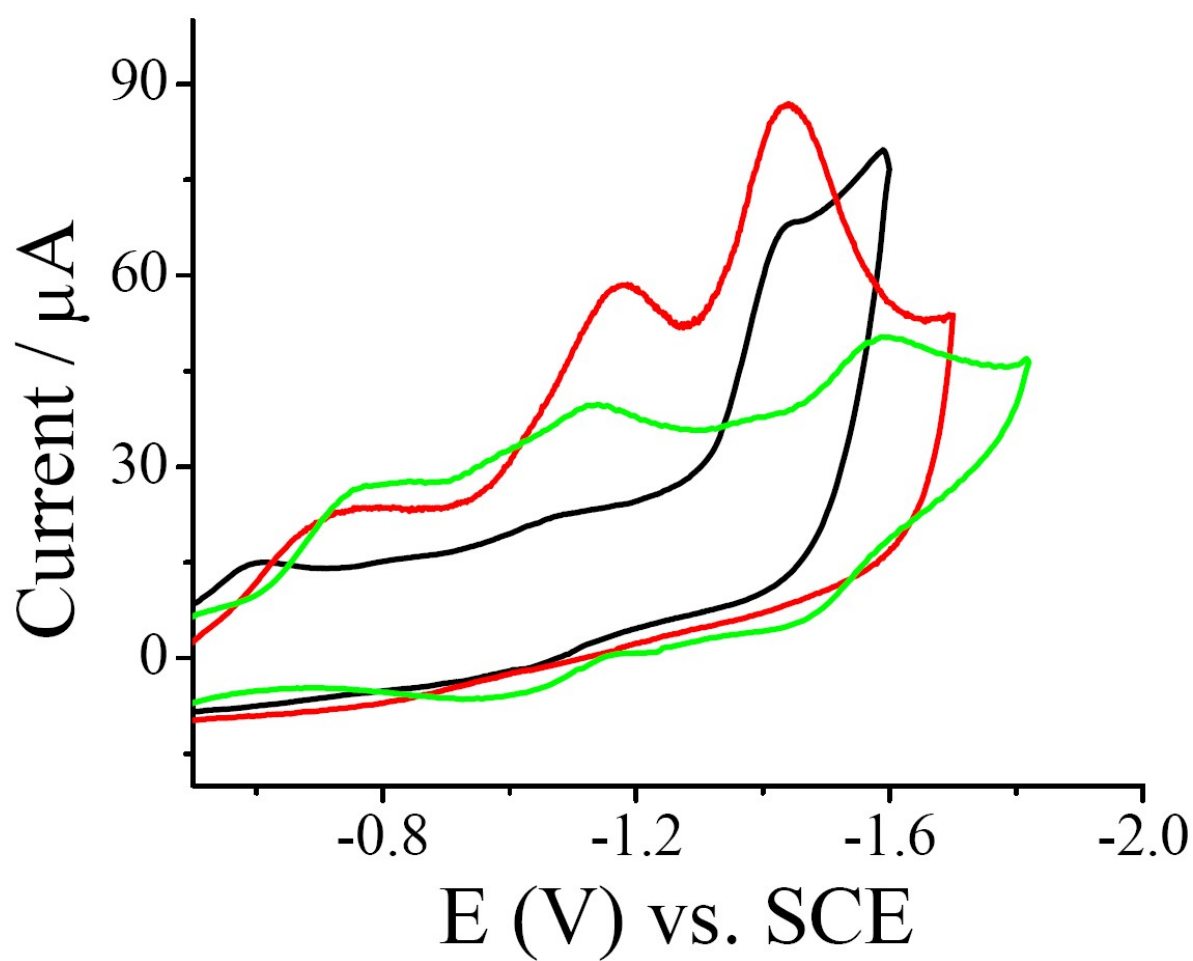

**Fig. S4.** Cyclic voltammograms of the complexes **(1)** (black), **(2)** (red) and **3** (green) in 20% DMF-Tris-HCl buffer at a scan rate of  $50 \text{ mV s}^{-1}$  using 0.1 mol KCl as the supporting electrolyte.

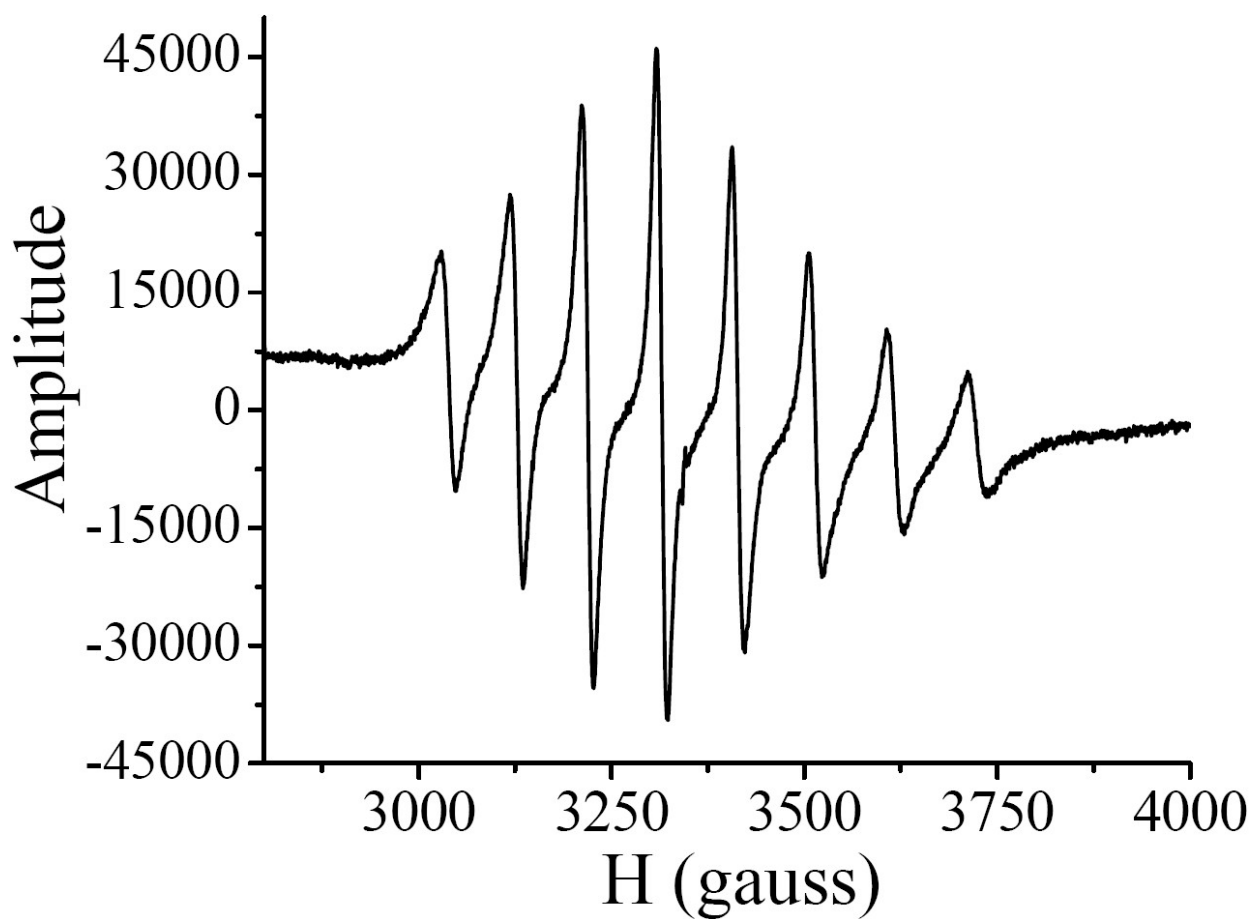

**Fig. S5.** EPR spectrum of complex **3** (5 mM) in MeOH. The experimental conditions and operating frequency are  $T = 298\text{ K}$ ,  $\nu = 9.39\text{ GHz}$ , modulation amplitude = 4.0 G at 100 kHz, and receiver gain =  $1 \times 10^{-3}$ .

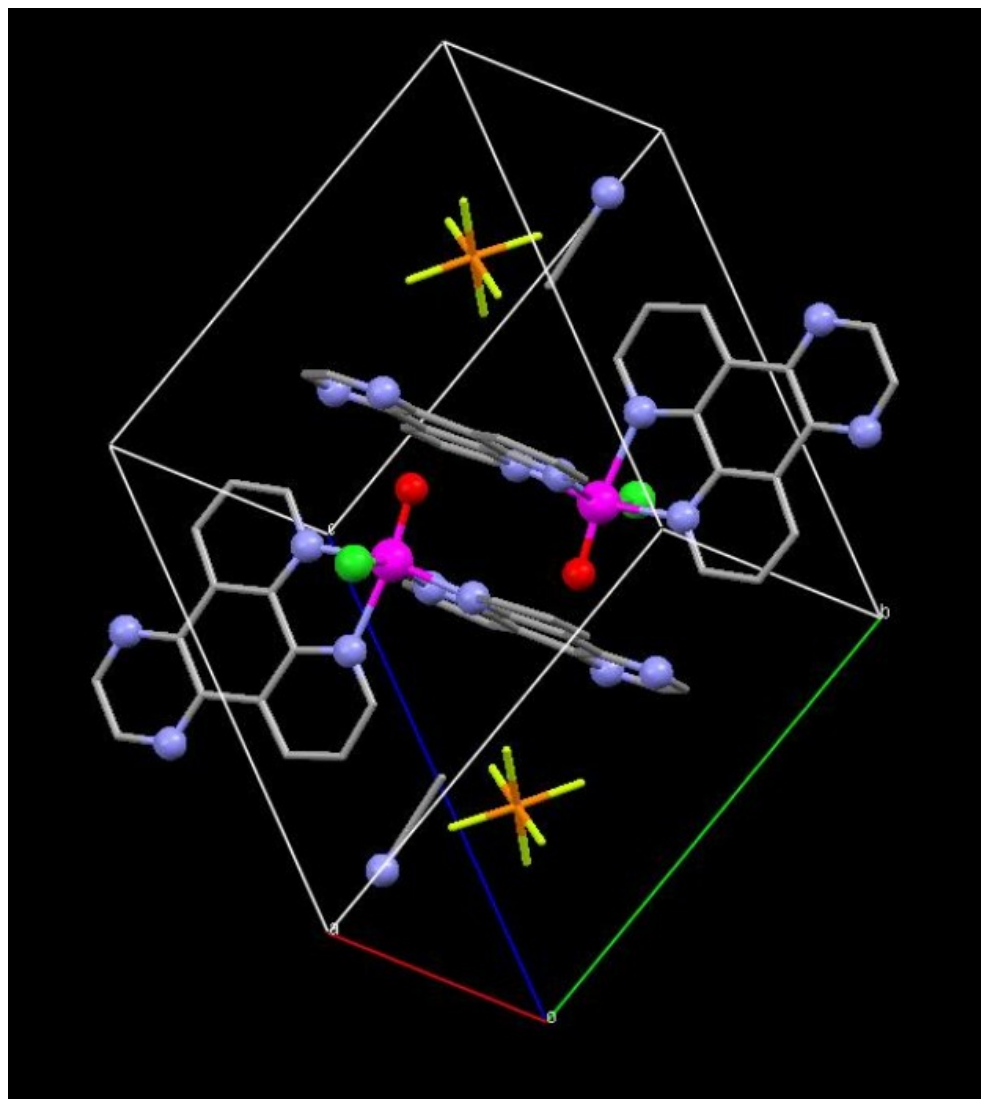

**Fig. S6.** Unit cell packing diagram of  $[\text{VOCl}(\text{dpq})_2](\text{PF}_6) \cdot \text{MeCN}$  (**2a**·MeCN).

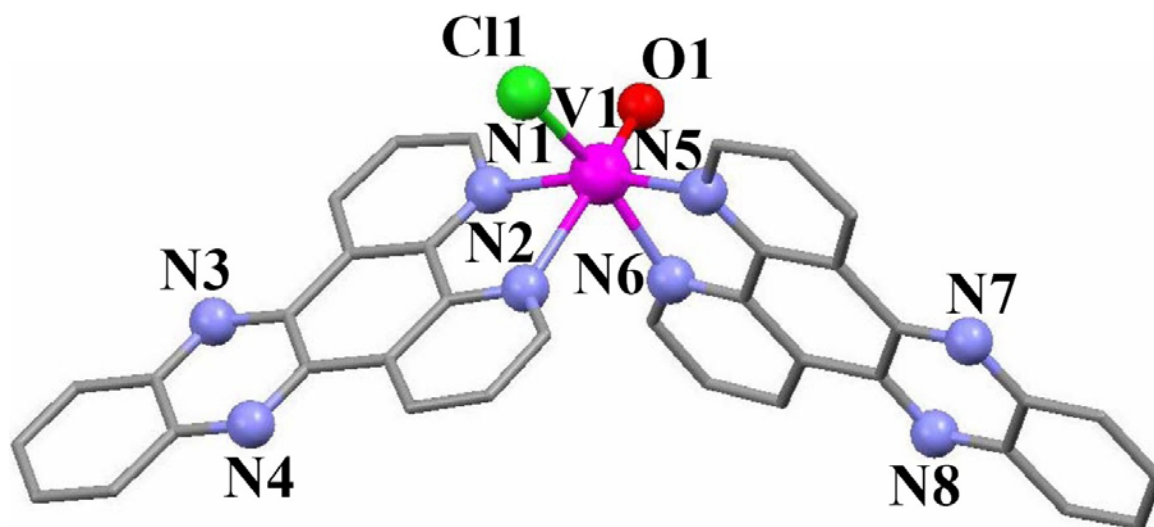

**Fig. S7.** The energy-minimized structure of the dppz complex **3** generated using the atomic coordinates of  $[\text{VOCl}(\text{dpq})_2](\text{PF}_6)$  (**2a**·MeCN).



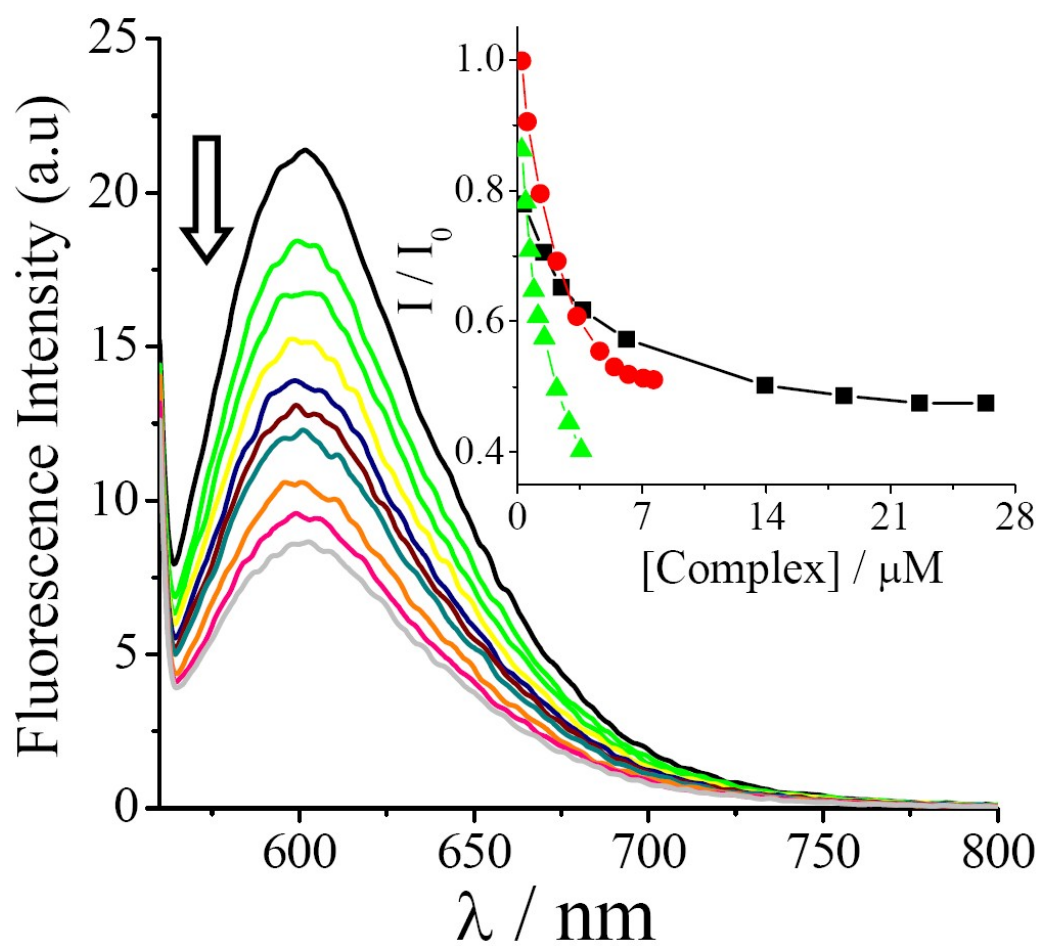

**Fig. S8.** Emission spectral traces of complex **3** using 350  $\mu$ M calf thymus DNA-bound ethidium bromide (1.3  $\mu$ M) at different complex concentrations in 5 mM phosphate buffer (pH, 6.85) at 25  $^{\circ}$ C. The inset shows the plots for the complexes **1** ( $\blacksquare$ ), **2** ( $\bullet$ ) and **3** ( $\blacktriangle$ ).

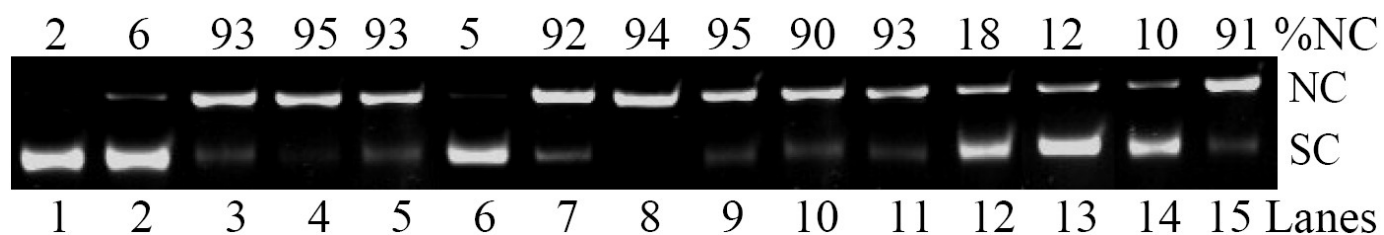

**Fig. S9.** Cleavage of SC pUC19 DNA (0.2  $\mu$ g, 30  $\mu$ M) by  $[\text{VOCl}(\text{B})_2]\text{Cl}$  (B = phen, **1**; dpq, **2**; dppz, **3**) in the presence of MPA (0.2 mM) and GSH (0.2 mM) as reducing agents in 50 mM Tris-HCl/NaCl buffer (pH 7.2) containing 1.5% DMF under dark reaction condition. Detail conditions are given below in a tabular form. The inhibition of cleavage was observed in the presence of hydroxyl radical scavengers like DMSO, KI and catalase.

| Lane No | Reaction conditions                                    |
|---------|--------------------------------------------------------|
| 1       | DNA control                                            |
| 2       | DNA + MPA                                              |
| 3-5     | DNA + complexes <b>1-3</b> + MPA                       |
| 6       | DNA + GSH                                              |
| 7-9     | DNA + complexes <b>1-3</b> + GSH                       |
| 10      | DNA + complex <b>3</b> + MPA + $\text{NaN}_3$ (0.2 mM) |
| 11      | DNA + complex <b>3</b> + MPA + TEMP (0.2 mM)           |
| 12      | DNA + complex <b>3</b> + MPA + DMSO (4 $\mu$ L)        |
| 13      | DNA + complex <b>3</b> + MPA + KI (0.2 mM)             |
| 14      | DNA + complex <b>3</b> + MPA + catalase (4 units)      |
| 15      | DNA + complex <b>3</b> + MPA + SOD (4 units)           |

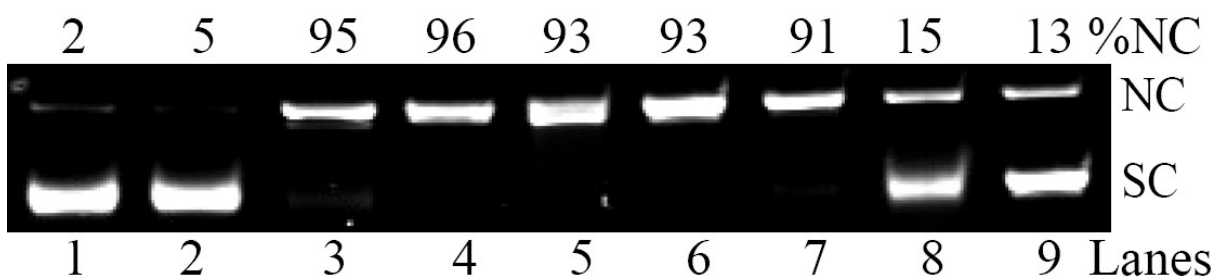

**Fig. S10.** Cleavage of SC pUC19 DNA (0.2  $\mu$ g, 30  $\mu$ M) by  $[\text{VOCl}(\text{B})_2]\text{Cl}$  (B = phen, **1**; dpq, **2**; dppz, **3**) (10  $\mu$ M) in the presence of  $\text{H}_2\text{O}_2$  (0.2 mM) as an oxidizing agent in 50 mM Tris-HCl/NaCl buffer (pH 7.2) containing 1.5% DMF under dark reaction condition. Detail conditions are given below in a tabular form.

| Lane No | Reaction conditions                                               |
|---------|-------------------------------------------------------------------|
| 1       | DNA control                                                       |
| 2       | DNA + $\text{H}_2\text{O}_2$                                      |
| 3-5     | DNA + complexes <b>1-3</b> + $\text{H}_2\text{O}_2$               |
| 6       | DNA + <b>3</b> + $\text{H}_2\text{O}_2$ + $\text{NaN}_3$ (0.2 mM) |
| 7       | DNA + <b>3</b> + $\text{H}_2\text{O}_2$ + TEMP (0.2 mM)           |
| 8       | DNA + <b>3</b> + $\text{H}_2\text{O}_2$ + DMSO (4 $\mu$ L)        |
| 9       | DNA + <b>3</b> + $\text{H}_2\text{O}_2$ + KI (0.2 mM)             |

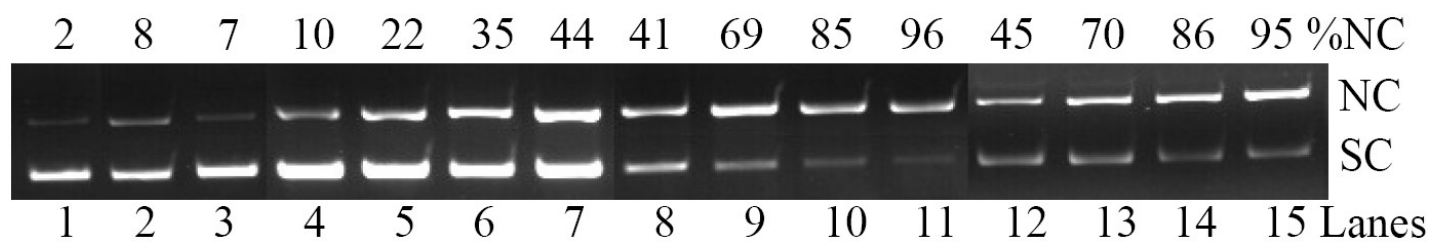

**Fig. S11.** Cleavage of SC pUC19 DNA (0.2  $\mu$ g, 30  $\mu$ M) by the complexes **1** – **3** (2.5  $\mu$ M) in 50 mM Tris-HCl/NaCl buffer (pH, 7.2) containing 1.5% DMF on photo-irradiation at 365 nm (6 W) using different exposure times. Detail conditions are given below in a tabular form.

| Lane No | Reaction conditions                          |
|---------|----------------------------------------------|
| 1       | DNA control (60 min)                         |
| 2       | DNA + dpq (10 $\mu$ M) (60 min)              |
| 3       | DNA + dppz (10 $\mu$ M) (60 min)             |
| 4-7     | DNA + complex <b>1</b> (15, 30, 45, 60 min.) |
| 8-11    | DNA + complex <b>2</b> (15, 30, 45, 60 min.) |
| 12-15   | DNA + complex <b>3</b> (15, 30, 45, 60 min.) |

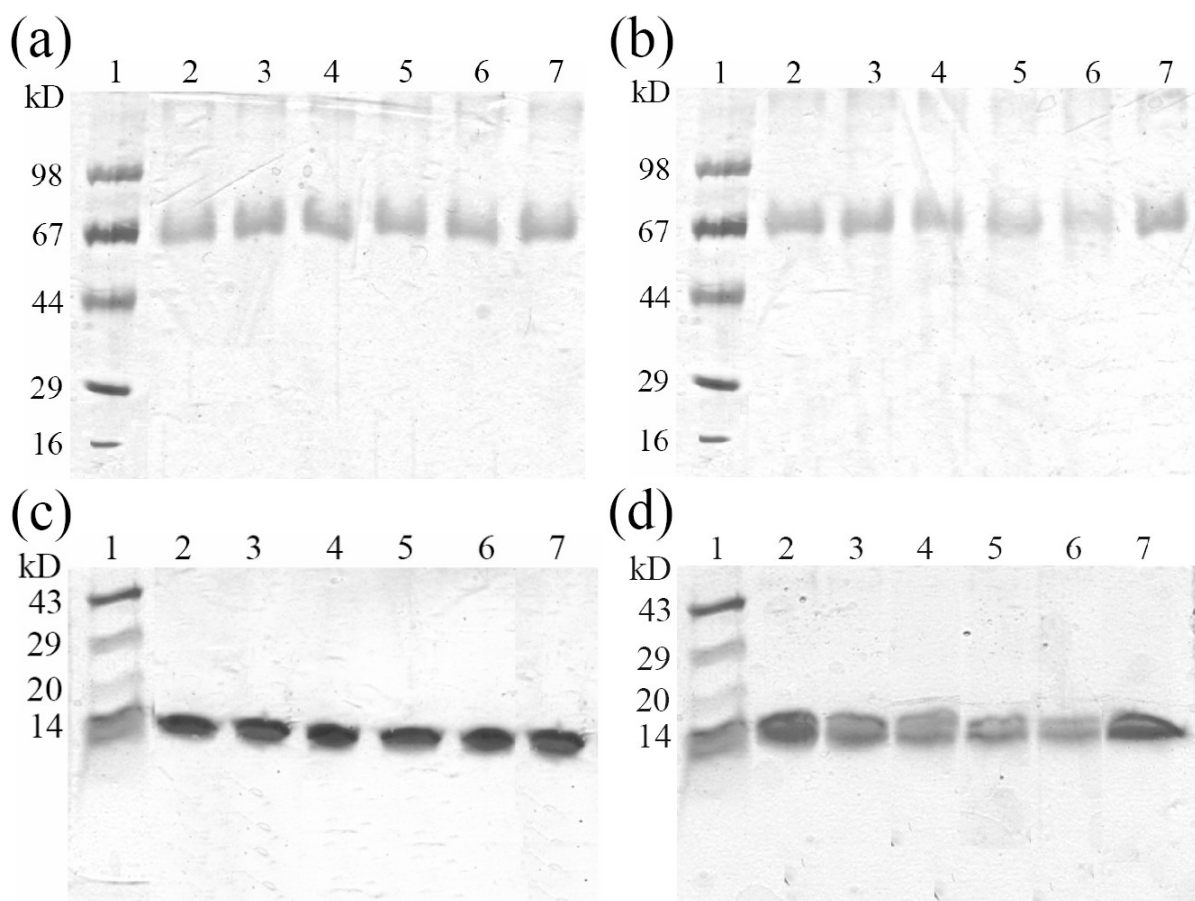

**Fig. S12.** Photo-induced cleavage of bovine serum albumin (BSA, 5 μM) and lysozyme (10 μM) in UV-A light of 365 nm by the complexes  $[\text{VOCl}(\text{B})_2]\text{Cl}$  (B: phen, **1**; dpq, **2**) in 50 mM Tris-HCl buffer having 0.75% DMF (pH 7.2). Panels (a) and (b) represent complexes **1** and **2**, respectively, in 12.5% SDS-PAGE: lane 1, molecular marker; lane 2, BSA control; lane 3, BSA + complex (25 μM, 2 h); lane 4, BSA + complex (50 μM, 2 h); lane 5, BSA + complex (75 μM, 2 h); lane 6, BSA + complex (100 μM, 2 h); lane 7, BSA + complex (100 μM, in dark). Panels (c) and (d) represent complexes **1** and **2**, respectively, in 16.5% tricine-SDS-PAGE: lane 1, molecular marker; lane 2, lysozyme control; lane 3, lysozyme + complex (25 μM, 2 h); lane 4, lysozyme + complex (50 μM, 2 h); lane 5, lysozyme + complex (75 μM, 2 h); lane 6, lysozyme + complex (100 μM, 2 h); lane 7, lysozyme + complex (100 μM, in dark).

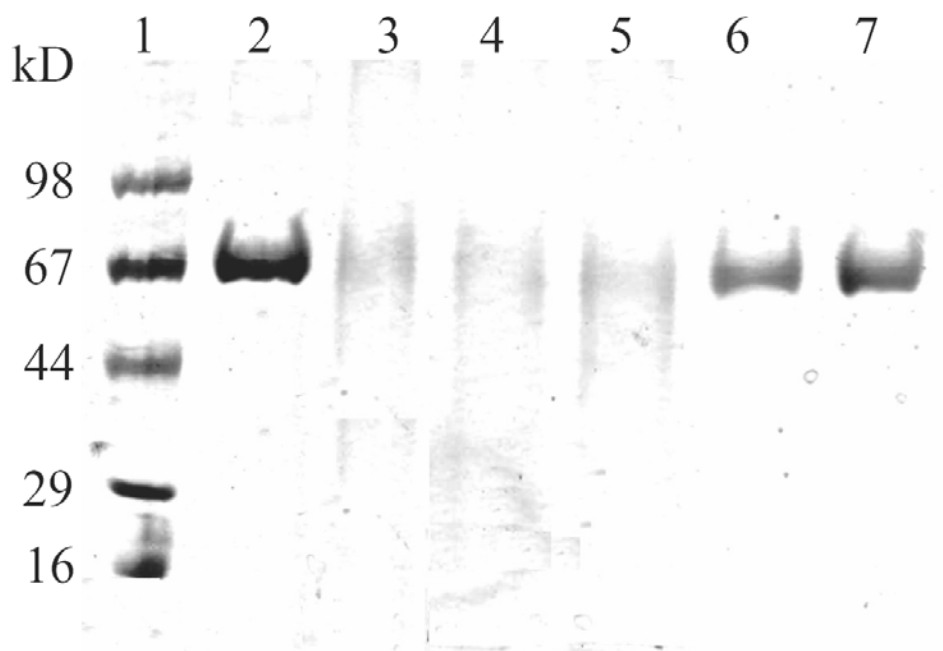

**Fig. S13.** 12.5% SDS-PAGE of BSA (5  $\mu$ M) on 2 h photoexposure in UV-A light (365 nm, 6 W) using complex **3** (100  $\mu$ M) in the presence of different additives in a 0.75% DMF-Tris-HCl buffer (50 mM, pH 7.2) at 25  $^{\circ}$ C: lane 1, standard molecular weight marker; lane 2, protein control on photoexposure; lane 3, BSA + **3**; lane 4, BSA + **3** + NaN<sub>3</sub>; lane 5, BSA + **3** + TEMP; lane 6, BSA + **3** + DMSO; lane 7, BSA + **3** + KI.

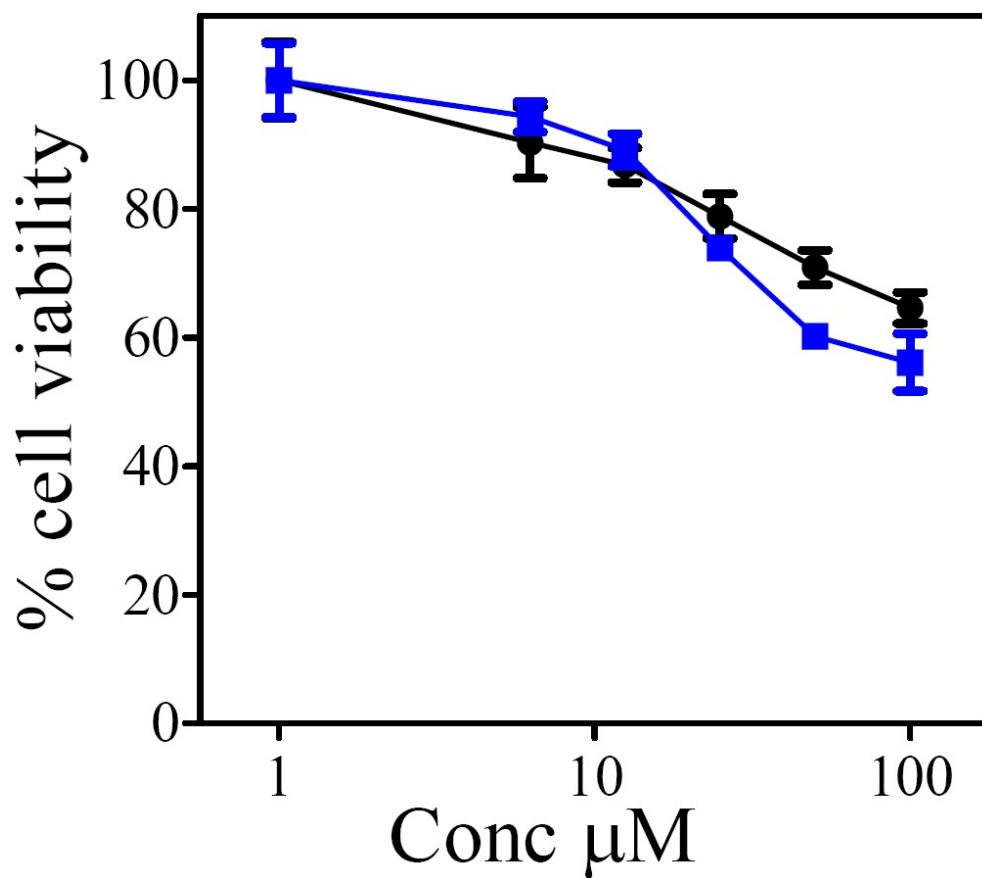

**Fig. S14.** Photocytotoxicity of the  $[\text{VOCl}(\text{dpq})_2]\text{Cl}$  (**2**) in HeLa cells upon incubation for 30 min in dark followed by irradiation with UV-A light (365 nm,  $0.549 \text{ J cm}^{-2}$ ) as determined by MTT assay. The dark-treated cells are shown by circle (●) and the UV-A light-exposed cells are shown by squares (■). The  $\text{IC}_{50}$  values in dark and UV-A light are greater than  $100 \mu\text{M}$ .

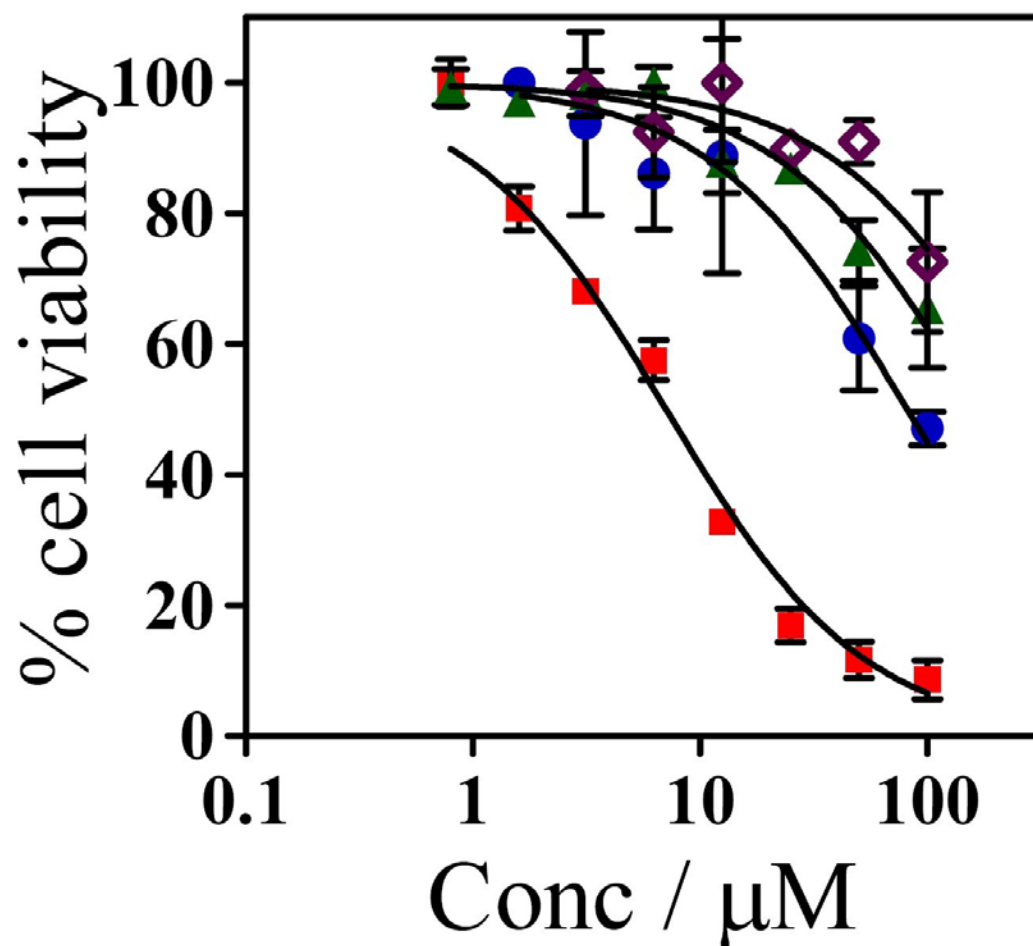

**Fig. S15.** Photocytotoxicity of  $[\text{VOCl}(\text{dppz})_2]\text{Cl}$  (**3**) (■), dppz ligand (●), dpq ligand (▲) and  $\text{VOSO}_4$  (◆) in HeLa cells upon incubation for 30 min in dark followed by irradiation with visible light (400 to 700 nm,  $20 \text{ J cm}^{-2}$ ) as determined by MTT assay. The  $\text{IC}_{50}$  values are 12, 95,  $>100$  and  $>100 \mu\text{M}$ , respectively.



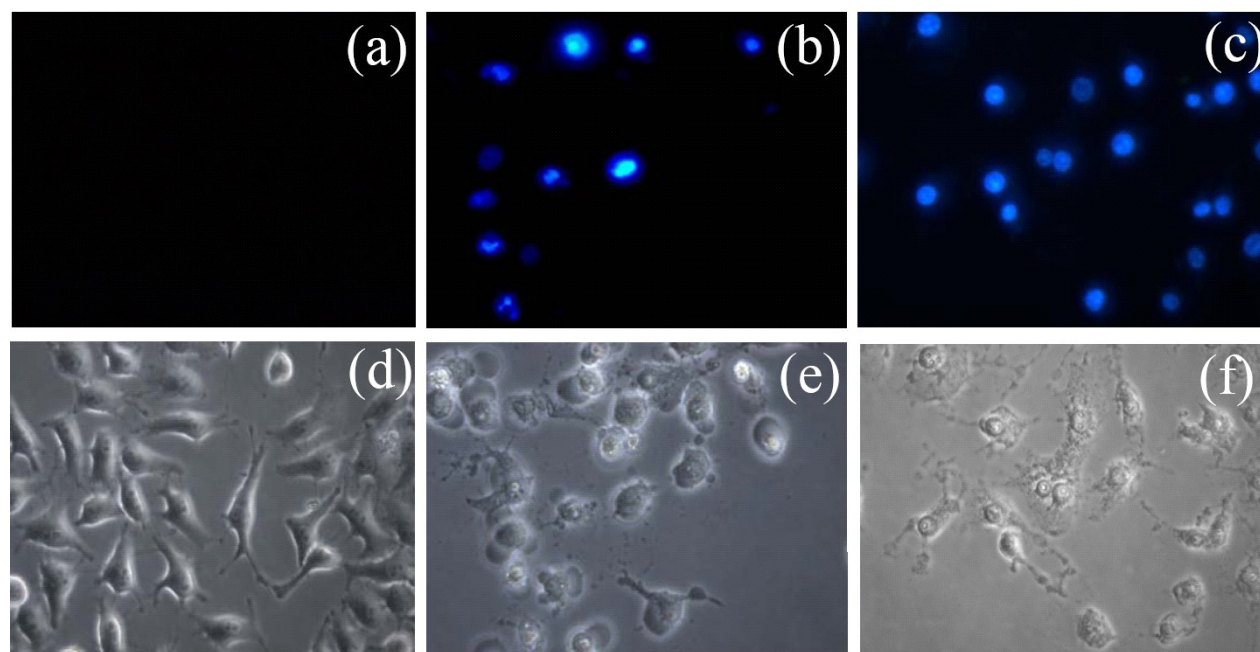

**Fig. S16.** DAPI staining of nuclei of HeLa cells (2 h post photoexposure) treated with **3** and UV-A light of 365 nm: (a) untreated control cells, (b) cells treated with 1  $\mu$ M of **3** and (c) cells treated with 10  $\mu$ M of **3**. Panels (a)-(c) are from a fluorescence microscope with 360/40 nm excitation filter and 460/50 nm emission filter. Panels (d)-(f) are the respective bright-field images.
